# Supplementary material for: Brain health measurement: a scoping review
Source: PubMed Central journal article supplement (PMC10862273; doi:10.1136/bmjopen-2023-080334), 2024-02-10

## Number of brain health studies by country

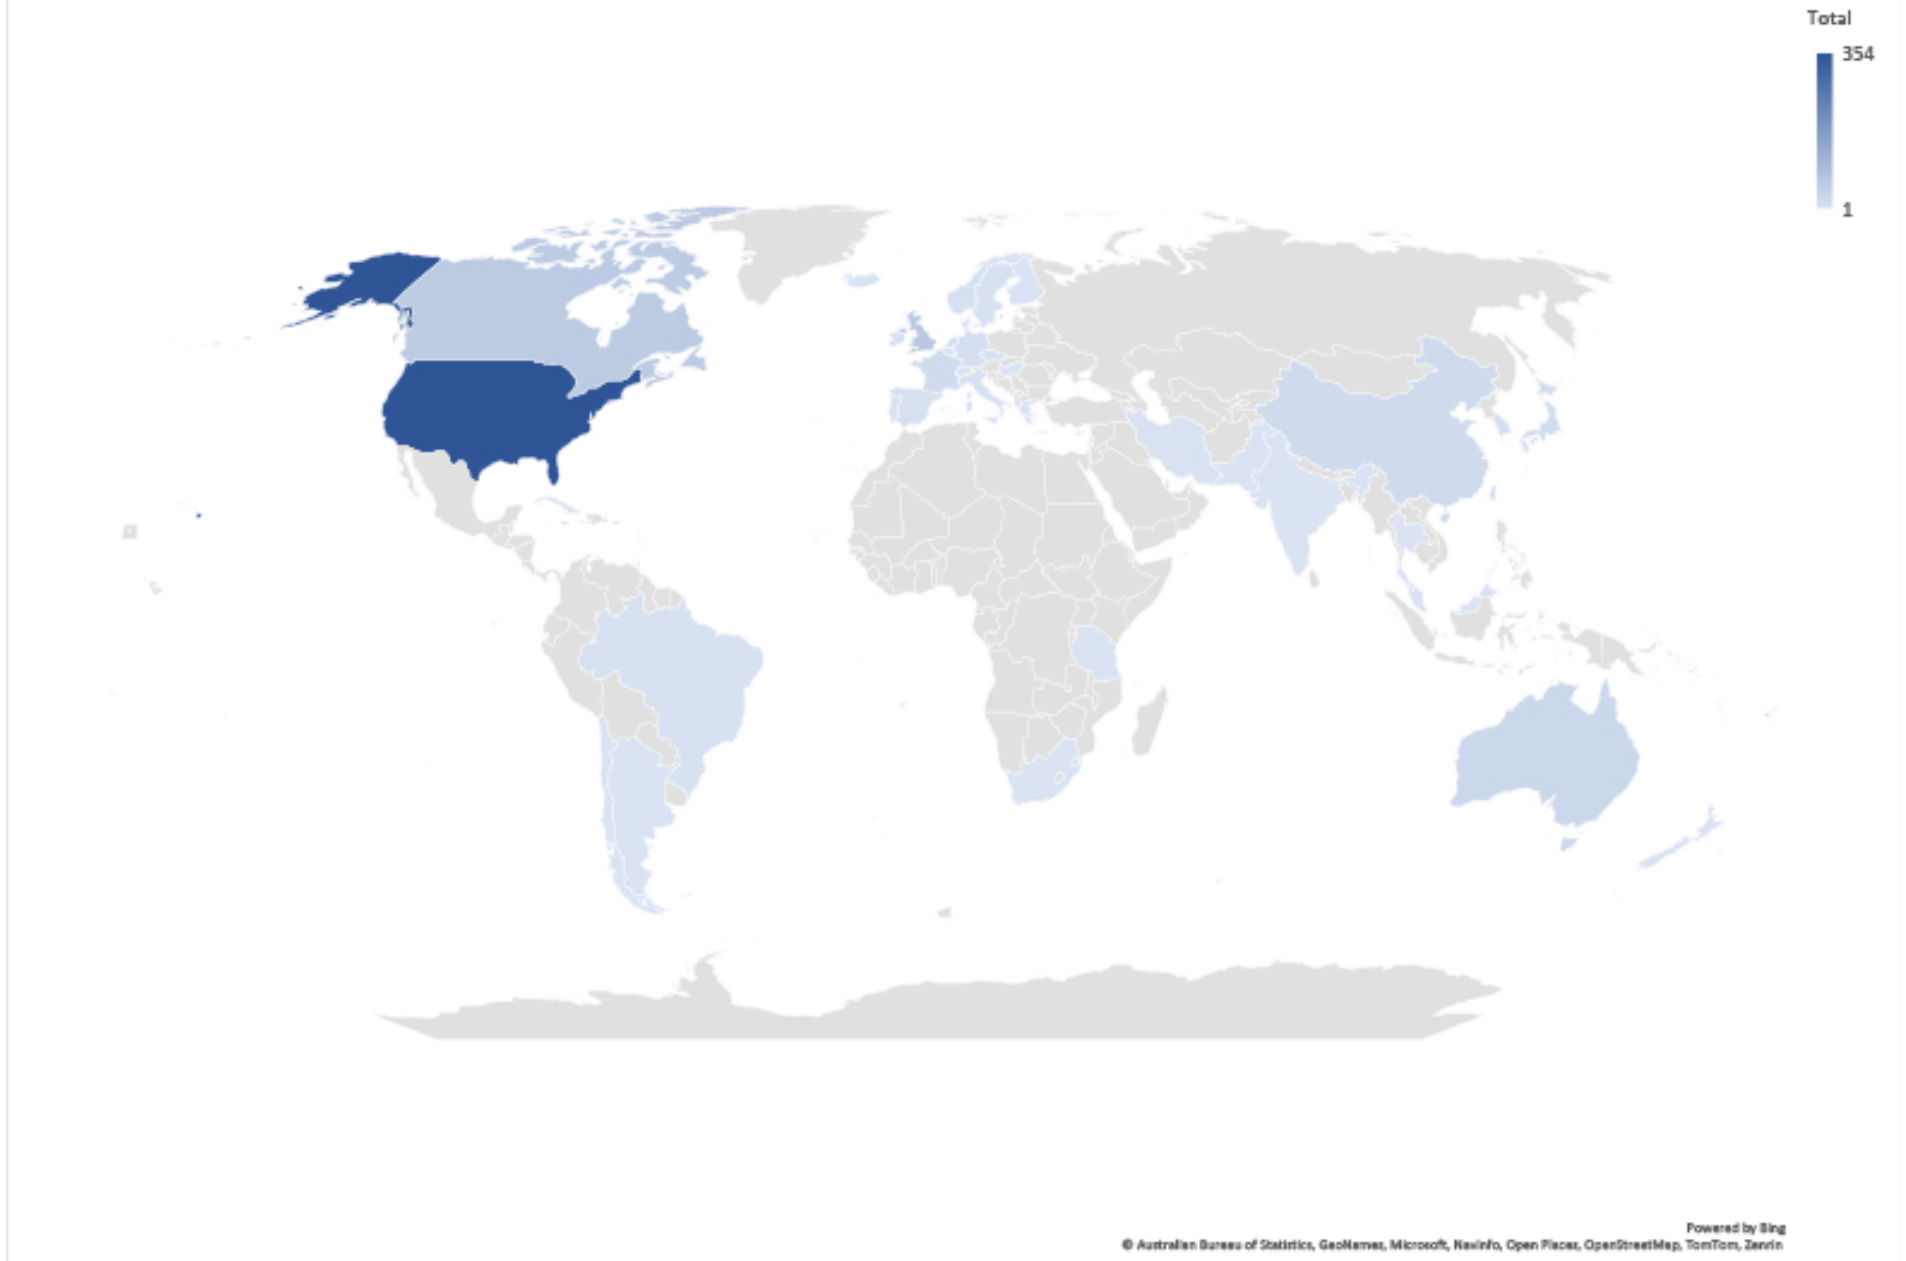

Supplement: bmjopen-2023-080334supp003.pdf [file bmjopen-2023-080334supp003.pdf]
